# Supplementary material
Source: HighWire-hosted journal article supplement (https://bmjopen.bmj.com/content/9/6/e021959)
Supplement: inline-supplementary-material-5 [file inline-supplementary-material-5.pdf]

|                                                                                      | Nakash 2008                      | Nicholas 2010                    | Postel 2010                                                                        | Eborall 2011                                                        | Wells 2011                       | Shilling 2011                   | Sanders 2012                     | Johannson 2015          | Sari 2017               | Fernandez-Alvarez 2017  | Henshall 2018           |
|--------------------------------------------------------------------------------------|----------------------------------|----------------------------------|------------------------------------------------------------------------------------|---------------------------------------------------------------------|----------------------------------|---------------------------------|----------------------------------|-------------------------|-------------------------|-------------------------|-------------------------|
| Was there a clear statement of the aims of the research?                             | Yes                              | Yes                              | Yes                                                                                | No – not explicitly in abstract or background                       | Yes                              | Yes                             | Yes                              | Yes                     | Yes                     | Yes                     | Yes                     |
| Is a qualitative methodology appropriate?                                            | Yes                              | Yes                              | This reported some qualitative data from open ended questionnaire response options | Yes                                                                 | Yes                              | Yes                             | Yes                              | Yes                     | Yes                     | Yes                     | Yes                     |
| Was the research design appropriate to address the aims of the research?             | Yes                              | Yes                              | Unclear                                                                            | Yes                                                                 | Yes                              | Yes                             | Yes                              | Yes                     | Yes                     | Yes                     | Yes                     |
| Was the recruitment strategy appropriate to the aims of the research?                | Yes                              | Yes                              | Yes                                                                                | Yes                                                                 | Yes                              | Yes                             | Yes                              | Yes                     | Yes                     | Yes                     | Yes                     |
| Was the data collected in a way that addressed the research issue?                   | Yes                              | Yes                              | Unclear                                                                            | Yes                                                                 | Yes                              | Yes                             | Yes                              | Yes                     | Yes                     | Yes                     | Yes                     |
| Has the relationship between researcher and participants been adequately considered? | Unclear – not mentioned in paper | Unclear - not mentioned in paper | Unclear                                                                            | Unclear – status of interviewer mentioned but not discussed further | Unclear - not mentioned in paper | Unclear- not mentioned in paper | Unclear – not mentioned in paper | Yes, this was discussed | Yes, this was discussed | Yes, this was discussed | Yes, this was discussed |

|                                                    |                                                                                                                                                                        |                                                                         |                                                                                                                                                                                                                 |                                                                                                   |                                                                                                                                                  |                                                                                                          |                                                                                                                                                                                                   |                                                                         |                                                           |                                                                                                   |                                                                                                                                                                        |
|----------------------------------------------------|------------------------------------------------------------------------------------------------------------------------------------------------------------------------|-------------------------------------------------------------------------|-----------------------------------------------------------------------------------------------------------------------------------------------------------------------------------------------------------------|---------------------------------------------------------------------------------------------------|--------------------------------------------------------------------------------------------------------------------------------------------------|----------------------------------------------------------------------------------------------------------|---------------------------------------------------------------------------------------------------------------------------------------------------------------------------------------------------|-------------------------------------------------------------------------|-----------------------------------------------------------|---------------------------------------------------------------------------------------------------|------------------------------------------------------------------------------------------------------------------------------------------------------------------------|
| Have ethical issues been taken into consideration? | Yes                                                                                                                                                                    | Yes                                                                     | Yes                                                                                                                                                                                                             | Yes                                                                                               | Unclear                                                                                                                                          | Yes                                                                                                      | Unclear                                                                                                                                                                                           | Yes                                                                     | Unclear                                                   | Unclear – informed consent mentioned, but not ethical approvals                                   | Unclear – informed consent mentioned, but not ethical approvals                                                                                                        |
| Was the data analysis sufficiently rigorous?       | Yes, apparently so (although not huge detail)                                                                                                                          | Yes                                                                     | Unclear – not mentioned other than that the data was systematically analysed – reflects that it was not a qualitative study as such.                                                                            | Yes                                                                                               | Unclear – very brief details and presented in quantitative manner                                                                                | Yes                                                                                                      | Yes                                                                                                                                                                                               | Yes                                                                     | Yes                                                       | Yes                                                                                               | Yes                                                                                                                                                                    |
| Is there a clear statement of findings?            | Yes                                                                                                                                                                    | Yes                                                                     | Yes, but brief                                                                                                                                                                                                  | Yes                                                                                               | Yes                                                                                                                                              | Yes, but focus of report was not on reasons for withdrawing and so this was somewhat buried and limited. | Yes                                                                                                                                                                                               | Yes                                                                     | Yes                                                       | Yes                                                                                               | Yes                                                                                                                                                                    |
| How valuable is the research to our review?        | Useful findings – NB: Limited 1 <sup>st</sup> order construct data perhaps because paper also included data from trial retainers (and this seemed to be main emphasis) | Useful – perhaps one of the richer papers in terms of insights and data | Less useful than other studies but still provides helpful insights that help to build on the findings of other studies. Qualitative data presented was very limited (both 1 <sup>st</sup> and 2 <sup>nd</sup> ) | Useful – more 1 <sup>st</sup> order constructs than some of the other papers e.g. Nakash, Sanders | Less useful than other studies but still provides helpful insights that help build on other studies. Qualitative data presented was very limited | Useful – but study focussed on decliners and withdrawers and provided limited data from the latter.      | Useful – but only 3 were withdrawers, rest were decliners and so like Nakash the emphasis of the paper (and the bulk of data and reflection provided) was on decliners. Few 1 <sup>st</sup> order | Useful – perhaps one of the richer papers in terms of insights and data | Useful, although limited 1 <sup>st</sup> order constructs | Useful – more 1 <sup>st</sup> order constructs than some of the other papers e.g. Nakash, Sanders | Useful findings – NB: Limited 1 <sup>st</sup> order construct data perhaps because paper also included data from trial retainers – out of 20 participants interviewed, |

|  |  |  |                                                                 |  |                                                                                                           |  |                              |  |  |  |                         |
|--|--|--|-----------------------------------------------------------------|--|-----------------------------------------------------------------------------------------------------------|--|------------------------------|--|--|--|-------------------------|
|  |  |  | order constructs) and was discussed in a more quantitative way. |  | (both 1 <sup>st</sup> and 2 <sup>nd</sup> order constructs) and was discussed in a more quantitative way. |  | constructs from withdrawers. |  |  |  | only 4 had dropped out. |
|--|--|--|-----------------------------------------------------------------|--|-----------------------------------------------------------------------------------------------------------|--|------------------------------|--|--|--|-------------------------|
