# Supplementary material
Source: HighWire-hosted journal article supplement (https://bmjopen.bmj.com/content/9/6/e021959)
Supplement: inline-supplementary-material-6 [file inline-supplementary-material-6.pdf]

## Search strategies

July 2018 Update

Database: Embase <1996 to 2018 Week 30>, Ovid MEDLINE(R) and Epub Ahead of Print, In-Process & Other Non-Indexed Citations, and Daily <1946 to July 23, 2018>

Search run 24<sup>th</sup> July 2018

URL: <https://ovidsp.ovid.com/>

- 1 exp clinical trial/ (1980088)
- 2 randomi?ed control\$ trial\$.tw. (336149)
- 3 randomi?ed controlled trial?.kw. (23247)
- 4 clinical trial?.tw,kw. (729051)
- 5 controlled trial?.tw,kw. (429924)
- 6 controlled clinical trial?.tw,kw. (50908)
- 7 pragmatic trial?.tw,kw. (2136)
- 8 complex intervention?.tw,kw. (4998)
- 9 or/1-8 (2639576)
- 10 qualitative research/ (94827)
- 11 qualitative research.tw,kw. (34500)
- 12 (qualitative adj3 method\$).tw. (53149)
- 13 (qualitative method? or qualitative methodology).kw. (2740)
- 14 (qualitative adj3 stud\$).tw. (95856)
- 15 qualitative study.kw. (2597)
- 16 focus groups/ use ppez (24850)
- 17 focus group?.tw,kw. (82443)
- 18 grounded theory/ (6039)
- 19 grounded theory.tw,kw. (21174)
- 20 narrative analys?s.tw,kw. (2147)
- 21 process evaluation.tw,kw. (5815)
- 22 mixed method?.tw,kw. (30409)
- 23 mixed method\$.mp. (31273)
- 24 mixed methodology.tw,kw. (711)
- 25 (in depth adj4 interview\$).tw. (41493)
- 26 in depth interview?.kw. (201)
- 27 ((semi structured or semistructured) adj5 interview\$).tw. (89673)
- 28 semi structured interview?.kw. (277)

29 qualitative interview\$.tw. (18002)  
 30 qualitative interview?.kw. (432)  
 31 (interview\$ and theme\$).tw. (61425)  
 32 interview?.kw. (6730)  
 33 (interview\$ and audio recorded).tw. (5252)  
 34 qualitative case stud\$.tw. (2011)  
 35 descriptive case stud\$.tw. (475)  
 36 qualitative case study.kw. (25)  
 37 descriptive case study.kw. (0)  
 38 qualitative exploration.tw,kw. (1994)  
 39 qualitative evaluation.tw,kw. (6296)  
 40 qualitative intervention.tw,kw. (25)  
 41 qualitative approach.tw,kw. (7887)  
 42 qualitative inquiry.tw,kw. (1197)  
 43 qualitativ\$ analys\$.tw. (31755)  
 44 qualitative analysis.kw. (1269)  
 45 (qualitative adj3 data).tw. (34567)  
 46 qualitative data.kw. (152)  
 47 discourse analysis.tw,kw. (3342)  
 48 discursive.tw,kw. (3245)  
 49 phenomenological.tw,kw. (29346)  
 50 thematic analysis.tw,kw. (27166)  
 51 ethnograph\$.tw. (18207)  
 52 ethnography.kw. (1849)  
 53 action research.tw,kw. (7525)  
 54 ethno?methodology.tw,kw. (150)  
 55 social construction.tw,kw. (1643)  
 56 or/10-55 (426531)  
 57 phenomenological characteristics.tw,kw. (242)  
 58 phenomenological model.tw,kw. (1806)  
 59 action research arm test.tw,kw. (1065)  
 60 protocol.ti. (79269)  
 61 or/57-60 (82341)  
 62 56 not 61 (418963)  
 63 9 and 62 (25059)  
 64 Patient Dropout/ use ppez (7679)  
 65 Patient Dropouts/ use emef (433)

66 Patient Recruitment/ use ppez (59391)  
 67 Research Subjects/ use emef (4918)  
 68 patient recruitment.kw. (179)  
 69 attrition.kw. (1451)  
 70 patient retention.kw. (32)  
 71 ((recruit\$ or participat\$ or take part or dropout\$ or drop\$ out\$ or withdr?wl\$ or barrier\$ or  
 retention or response\$ or respond\$ or attrition) adj10 trial?).tw. (134886)  
 72 or/64-71 (204550)  
 73 63 and 72 (3670)  
 74 limit 73 to english language (3640)  
 75 74 not abstract.pt. (3020)  
 76 exp animals/ not human/ (7165523)  
 77 exp nonhuman/ not humans/ (3518640)  
 78 75 not (76 or 77) (3011)  
 79 limit 78 to yr="2010 -Current" (2280)  
 80 remove duplicates from 79 (1325)

\*\*\*\*\*

**Database: PsycINFO <2002 to July Week 3 2018>**

**Search run 24<sup>th</sup> July 2018**

**URL: <https://ovidsp.ovid.com/>**

1 clinical trials/ (10606)  
 2 randomi?ed control\$ trial\$.tw. (26600)  
 3 clinical trial?.tw. (27527)  
 4 controlled trial?.tw. (31463)  
 5 controlled clinical trial?.tw. (2319)  
 6 pragmatic trial?.tw. (191)  
 7 complex intervention?.tw. (624)  
 8 or/1-7 (58183)  
 9 qualitative research/ (7513)  
 10 qualitative research.tw. (17348)  
 11 (qualitative adj3 method\$).tw. (21172)  
 12 (qualitative adj3 stud\$).tw. (46815)  
 13 focus group?.tw. (27999)  
 14 grounded theory/ (3229)  
 15 grounded theory.tw. (12698)

16 narrative analys?s.tw. (1966)  
 17 process evaluation.tw. (1167)  
 18 mixed method?.tw. (18416)  
 19 mixed methodology.tw. (731)  
 20 (in depth adj4 interview\$.tw. (21003)  
 21 ((semi structured or semistructured) adj5 interview\$.tw. (34163)  
 22 qualitative interview\$.tw. (7708)  
 23 (interview\$ and theme\$.tw. (33368)  
 24 interview?.kw. (0)  
 25 (interview\$ and audio recorded).tw. (1253)  
 26 qualitative case stud\$.tw. (4333)  
 27 descriptive case stud\$.tw. (565)  
 28 qualitative exploration.tw. (944)  
 29 qualitative evaluation.tw. (751)  
 30 qualitative intervention.tw. (9)  
 31 qualitative approach.tw. (3312)  
 32 qualitative inquiry.tw. (1457)  
 33 qualitativ\$ analys\$.tw. (10100)  
 34 (qualitative adj3 data).tw. (17288)  
 35 discourse analysis/ (6373)  
 36 discursive.tw,kw. (7705)  
 37 phenomenological.tw. (20981)  
 38 thematic analysis.tw. (9031)  
 39 ethnograph\$.tw. (21222)  
 40 action research.tw. (6521)  
 41 ethno?methodology.tw. (369)  
 42 social construction.tw. (2816)  
 43 or/9-42 (211086)  
 44 phenomenological characteristics.tw. (129)  
 45 phenomenological model.tw. (123)  
 46 action research arm test.tw. (110)  
 47 protocol.ti. (2319)  
 48 or/44-47 (2678)  
 49 43 not 48 (210507)  
 50 experimental attrition/ (307)  
 51 experimental recruitment/ (96)  
 52 experimental subjects/ (2407)

53 dropouts/ (348)  
 54 ((recruit\$ or participat\$ or take part or dropout\$ or drop\$ out\$ or withdr?wl\$ or barrier\$ or retention or response\$ or respond\$ or attrition) adj10 trial?).tw. (13610)  
 55 or/50-54 (16312)  
 56 8 and 49 and 55 (484)  
 57 exp animals/ not human/ (179236)  
 58 56 not 57 (484)  
 59 limit 58 to (english language and yr="2010 -Current") (339)

\*\*\*\*\*

# **Cochrane Central Register of Controlled Trials : Issue 7, 2018**

Search run 25<sup>th</sup> July 2018

URL: <http://www.cochranelibrary.com/>

- #1 MeSH descriptor: [Qualitative Research] this term only
- #2 qualitative NEXT research:ti,ab,kw or qualitative NEXT method:ti,ab,kw or qualitative NEXT study:ti,ab,kw (Word variations have been searched)
- #3 MeSH descriptor: [Focus Groups] this term only
- #4 MeSH descriptor: [Grounded Theory] this term only
- #5 mixed NEXT method:ti,ab,kw or narrative NEXT analysis:ti,ab,kw (Word variations have been searched)
- #6 interview:ti,ab,kw
- #7 qualitative case study:ti,ab,kw or descriptive case study:ti,ab,kw (Word variations have been searched)
- #8 qualitative NEXT exploration:ti,ab,kw or qualitative NEXT evaluation:ti,ab,kw or qualitative intervention:ti,ab,kw or qualitative approach:ti,ab,kw or qualitative analysis:ti,ab,kw (Word variations have been searched)
- #9 qualitative data:ti,ab,kw (Word variations have been searched)
- #10 discourse analysis:ti,ab,kw or discursive:ti,ab,kw (Word variations have been searched)
- #11 social construction:ti,ab,kw or action research:ti,ab,kw or ethnography:ti,ab,kw or thematic analysis:ti,ab,kw or phenomenological:ti,ab,kw (Word variations have been searched)
- #12 #1 or #2 or #3 or #4 or #5 or #6 or #7 or #8 or #9 or #10 or #11
- #13 MeSH descriptor: [Patient Dropouts] this term only
- #14 MeSH descriptor: [Patient Selection] this term only
- #15 ((recruit\$ or participat\$ or take part or dropout\$ or drop\$ out\$ or withdr?wl\$ or barrier\$ or retention or response\$ or respond\$ or attrition) near/10 trial?):ti,ab,kw (Word variations have been searched)

#16 #13 or #14 or #15  
 #17 #12 and #16 Publication Year from 2010 to 2018, in Trials  
 #18 abstract:pt (Word variations have been searched)  
 #19 #17 not #18 (385)

# **Social Sciences Citation Index**

**Search run: 24<sup>th</sup> July 2018**

**Web of Knowledge: URL <http://wok.mimas.ac.uk/>**

#32 382 #21 AND #24 AND #31 Refined by: DOCUMENT TYPES: ( ARTICLE OR REVIEW )  
 Indexes=SSCI Timespan=2010-2018

# 31 12,293 #25 OR #26 OR #27 OR #28 OR #29 OR #30

# 30 1,646 (TS=patient dropout) AND LANGUAGE: (English)

# 29 1,311 (TS=patient attrition) AND LANGUAGE: (English)

# 28 2,040 (TS=patient retention) AND LANGUAGE: (English)

# 27 4761 (TS=(( withdraw\$ or barrier\$ or retention or response\$ or respond\$ or attrition)  
 NEAR/10 trial?)) AND LANGUAGE: (English)

# 26 136 (TS=(("take part" or dropout\$ or "drop\$ out") NEAR/10 trial?)) AND LANGUAGE:  
 (English)

# 25 220 (TS=((recruit\$ or participat\$) NEAR/10 trial?)) AND LANGUAGE: (English)

# 24 42,063 #23 OR #22

# 23 42,671 (TS=randomised controlled trial) AND LANGUAGE: (English)

# 22 42,671 (TS=randomized controlled trial) AND LANGUAGE: (English)

# 21 148,316 #20 OR #19 OR #18 OR #17 OR #16 OR #15 OR #14 OR #13 OR #12 OR #11  
 OR #10 OR #9 OR #8 OR #7 OR #6 OR #5 OR #4 OR #3 OR #2 OR #1

# 20 7,765 (TS=thematic analysis) AND LANGUAGE: (English)

# 19 16,672 (TS=action research) AND LANGUAGE: (English)

# 18 7,436 (TS=social construction) AND LANGUAGE: (English)

# 17 5,371 (TS=discursive) AND LANGUAGE: (English)

# 16 11,763 (TS=discourse analysis) AND LANGUAGE: (English)

# 15 6,704 (TS=(qualitative near/1 data)) AND LANGUAGE: (English)

# 14 8,581 (TS=(qualitative near/1 analysis)) AND LANGUAGE: (English)

# 13 3,122 (TS=(qualitative near/1 approach)) AND LANGUAGE: (English)

# 12 122 (TS=(qualitative near/1 intervention)) AND LANGUAGE: (English)

# 11 688 (TS=(qualitative near/1 evaluation)) AND LANGUAGE: (English)

# 10 529 (TS=(qualitative near/1 exploration)) AND LANGUAGE: (English)

# 9 40,423 (TS=(in depth interview\* or semi structured interview\* or qualitative interview\*)) AND LANGUAGE: (English)

# 8 7,414 (TS=narrative analysis) AND LANGUAGE: (English)

# 7 19,879 (TS=mixed method\*) AND LANGUAGE: (English)

# 6 8,541 (TS=grounded theory) AND LANGUAGE: (English)

# 5 40,298 (TS=focus group\*) AND LANGUAGE: (English)

# 4 2,062 (TS= (qualitative NEAR/1 studies)) AND LANGUAGE: (English)

#3 15,953 ((TS= (qualitative NEAR/1 study))) AND LANGUAGE: (English)

# 2 8,468 ((TS= (qualitative NEAR/1 method\*))) AND LANGUAGE: (English)

# 1 12,460 (TS= (qualitative NEAR/1 research)) AND LANGUAGE: (English)

### Cumulative Index of Nursing & Allied Health Literature

Search run 25<sup>th</sup> July 2018

URL: <http://search.ebscohost.com/>

S18 S7 AND S16 Limiters - Published Date: 20100101-20181231 Narrow by Language: - English (278)

S17 S7 AND S16

S16 S8 OR S9 OR S10 OR S11 OR S12 OR S13 OR S14 OR S15

S15 TX discourse analysis OR TX discursive OR TX thematic analysis OR TX ethnography OR TX action research OR TX phenomenological

S14 TX qualitative exploration OR TX qualitative evaluation OR TX qualitative intervention\* OR TX qualitative approach OR TX qualitative analysis OR TX qualitative data

S13 TX mixed method\* OR TX semi structured interview\* OR TX in depth interview\*

S12 TX focus group\* OR TX grounded theory OR TX narrative analysis

S11 TX qualitative n3 research OR TX qualitative n3 method\* OR TX qualitative n3 study

S10 (MH "Focus Groups")

S9 (MH "Semi-Structured Interview") OR (MH "Structured Interview") OR (MH "Narratives")

S8 (MH "Qualitative Studies+")

S7 S3 AND S6

S6 S4 OR S5

S5 TX ((recruit\$ or participat\$ or take part or dropout\$ or drop\$ out\$ or withdr?wl\$ or barrier\$ or retention or response\$ or respond\$ or attrition) N10 trial?)

S4 (MH "Research Subjects+")

S3 S1 OR S2

S2 TX ranrandomized or randomised or trial\*  
S1 (MH "Clinical Trials+")

**Applied Social Sciences Index and Abstracts**

**Search run 25<sup>th</sup> July 2018**

**<http://search.proquest.com/assia/>**

S8 S5 and S6Limits applied Language:English PY: 2010-2018 (373)

S7 S5 and S6

S6 (recruit\* N/10 trial?) OR (participat\* N/10 trial? OR "take part" N/10 trial?) OR (dropout\* N/10 trial? OR drop\* our\* N/10 trial?) OR (withdraw\* N/10 trial\* OR barrier\* N/10 trial?) OR (retention N/10 trial? OR response\* N/10 trial?) OR (respond\* N/10 trial? OR attrition N/10 trial?)

S5 S3 and S4

S4 qualitative OR (focus group\* OR interview\*) OR (mixed method\* OR ethnography) OR (phenomenological OR discourse analysis) OR discursive

S3 S1 or S2

S2 randomized OR randomised

S1 SU.EXACT("Clustor randomized trials") OR SU.EXACT("Clinical randomized controlled trials") OR SU.EXACT("Single blind randomized controlled trials") OR SU.EXACT("Cluster randomized controlled trials") OR SU.EXACT("Randomized controlled trials") OR SU.EXACT("Double blind randomized trials") OR SU.EXACT("Prospective controlled trials") OR SU.EXACT("Double blind randomized controlled trials") OR SU.EXACT("Clinical trials")
