# Supplementary material
Source: HighWire-hosted journal article supplement (https://bmjopen.bmj.com/content/9/6/e021959)

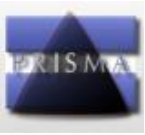

## PRISMA Flow Diagram: Retention Review

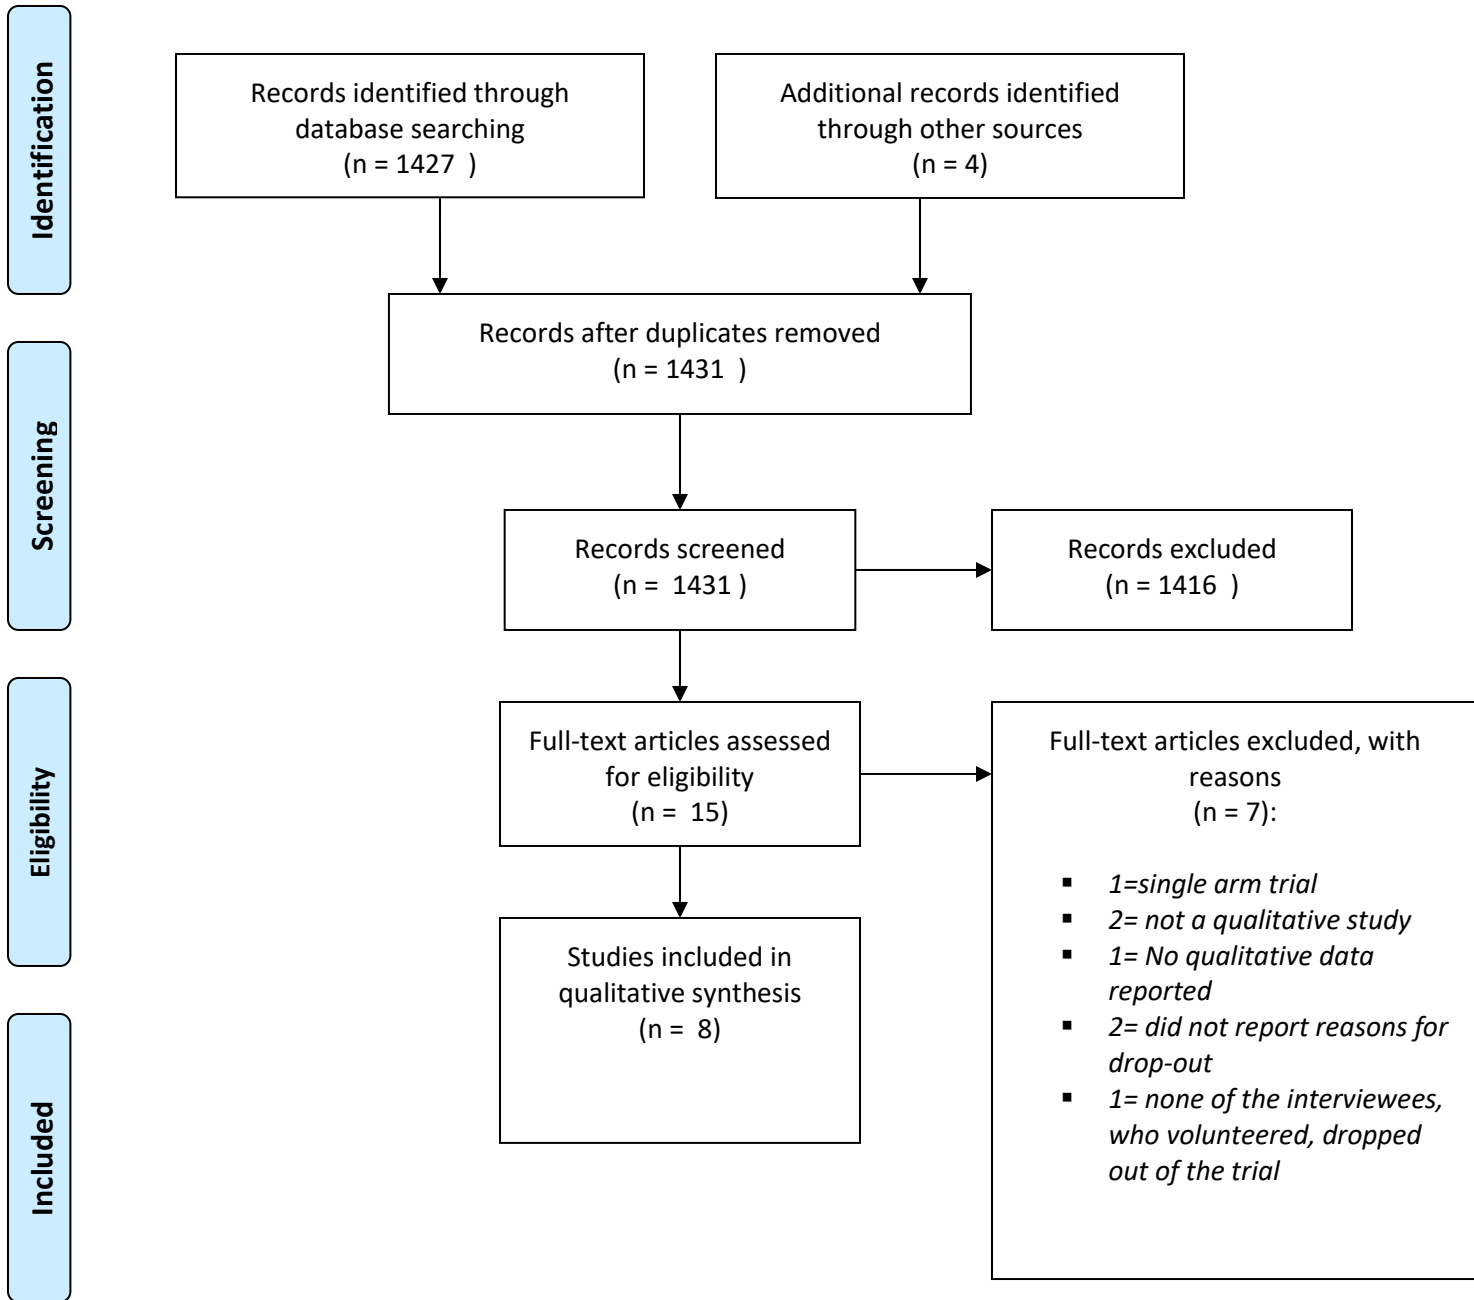

Supplement: inline-supplementary-material-8 [file inline-supplementary-material-8.pdf]
